# Supplementary material
Source: bioRxiv or medRxiv preprint supplement (https://medrxiv.org/highwire/filestream/91643/field_highwire_adjunct_files/0/2020.07.29.20164640-1.pdf)

*Supplemental Table 1: Univariable logistic regression results with in-hospital mortality as the outcome*

| <b>Variable</b>                       | <b>Univariable Odds Ratio (95% CI)</b> | <b>P-value</b> |
|---------------------------------------|----------------------------------------|----------------|
| Age (Continuous)                      | 1.06 (1.05-1.06)                       | 1.83E-64       |
| Age <55                               | Ref                                    | Ref            |
| Age 55-64                             | 2.43 (1.78-3.31)                       | 2.19E-08       |
| Age 65-74                             | 4.1 (3.05-5.47)                        | 3.77E-21       |
| Age >=75                              | 8.25 (6.22-10.9)                       | 1.82E-49       |
| Male                                  | 1.02 (0.868-1.19)                      | 0.831          |
| Race: Non-Hispanic White              | Ref                                    | Ref            |
| Race: Non-Hispanic Black              | 0.733 (0.589-0.913)                    | 0.00561        |
| Race: Hispanic                        | 0.606 (0.486-0.755)                    | 8.31E-06       |
| Race: Asian                           | 0.769 (0.518-1.14)                     | 0.192          |
| Race: Other                           | 0.85 (0.66-1.1)                        | 0.211          |
| Hypertension                          | 1.29 (1.1-1.52)                        | 0.00174        |
| Diabetes                              | 1.3 (1.09-1.56)                        | 0.00339        |
| Coronary Artery Disease               | 1.87 (1.5-2.32)                        | 1.87E-08       |
| Heart Failure                         | 1.62 (1.22-2.15)                       | 0.000929       |
| Atrial Fibrillation                   | 2.28 (1.7-3.04)                        | 2.47E-08       |
| Chronic Kidney Disease                | 1.5 (1.19-1.88)                        | 0.000503       |
| COPD/Asthma                           | 0.941 (0.71-1.25)                      | 0.67           |
| Obesity                               | 0.825 (0.613-1.11)                     | 0.205          |
| Cancer                                | 1.22 (0.904-1.66)                      | 0.19           |
| Initial temperature                   | 0.91 (0.867-0.954)                     | 0.000116       |
| Initial heart rate                    | 1 (0.997-1)                            | 0.654          |
| Initial systolic blood pressure       | 0.998 (0.995-1)                        | 0.3            |
| Initial respiratory rate              | 1.07 (1.06-1.09)                       | 1.60E-21       |
| Initial hypoxia (O <sub>2</sub> <92%) | 2.57 (2.16-3.05)                       | 3.73E-27       |
| Manhattan facility                    | 0.483 (0.412-0.566)                    | 3.35E-19       |
| Current or former smoker              | 1.12 (0.94-1.34)                       | 0.202          |

*Supplemental Table 2: Multivariable logistic regression results for inflammatory markers as predictors of in-hospital mortality, adjusting for age, comorbidities, and initial oxygen saturation, stratified by sex. The unstratified model includes sex. Interaction P-values indicate the significance of the interaction term between sex and the lab value in a multivariable model incorporating the interaction. Lab values were standardized prior to stratification and regression; odds ratios represent the change in odds associated with a one-standard-deviation increase in the lab value.*

| <b>Lab test</b>      | <b>Male Odds Ratio<br/>(95% CI)</b> | <b>Female Odds Ratio<br/>Ratio (95% CI)</b> | <b>Unstratified Odds<br/>ratio (95% CI)</b> | <b>Interaction<br/>P-value</b> |
|----------------------|-------------------------------------|---------------------------------------------|---------------------------------------------|--------------------------------|
| <b>WBC</b>           | 1.213 (0.979-1.5)                   | 1.751 (1.26-2.44)                           | 1.33 (1.11-1.59)                            | 0.0522                         |
| <b>ALBUMIN</b>       | 0.668 (0.524-0.85)                  | 0.834 (0.645-1.08)                          | 0.754 (0.634-0.896)                         | 0.475                          |
| <b>DDIMER</b>        | 1.176 (0.965-1.43)                  | 1.465 (1.07-2)                              | 1.214 (1.03-1.43)                           | 0.24                           |
| <b>FERRITIN</b>      | 0.947 (0.776-1.16)                  | 1.66 (1.2-2.29)                             | 1.1 (0.944-1.28)                            | 0.00241                        |
| <b>PROCALCITONIN</b> | 2.34 (1.19-4.61)                    | 1.046 (0.85-1.29)                           | 1.297 (1.06-1.59)                           | 0.0335                         |
| <b>LDH</b>           | 1.26 (1.01-1.57)                    | 2.504 (1.66-3.79)                           | 1.534 (1.25-1.89)                           | 0.00317                        |
| <b>CRP</b>           | 1.66 (1.32-2.09)                    | 1.246 (0.974-1.59)                          | 1.451 (1.23-1.71)                           | 0.224                          |
| <b>IL1B</b>          | 1.035 (0.769-1.39)                  | 0.957 (0.672-1.36)                          | 0.982 (0.776-1.24)                          | 0.719                          |
| <b>IL6</b>           | 1.774 (1.26-2.49)                   | 1.324 (0.971-1.8)                           | 1.496 (1.21-1.85)                           | 0.177                          |
| <b>IL8</b>           | 3.706 (1.31-10.6)                   | 6.234 (1.22-31.7)                           | 3.857 (1.65-9.01)                           | 0.876                          |
| <b>TNFa</b>          | 0.881 (0.502-1.55)                  | 2.252 (0.72-7.05)                           | 1.073 (0.885-1.3)                           | 0.204                          |

*Supplemental Table 3: Multivariable logistic regression results for inflammatory markers as predictors of in-hospital mortality, adjusting for age, sex, comorbidities, stratified by initial oxygen saturation. The unstratified model includes initial oxygen saturation. Interaction P-values indicate the significance of the interaction term between sex and the lab value in a multivariable model incorporating the interaction. Lab values were standardized prior to stratification and regression; odds ratios represent the change in odds associated with a one-standard-deviation increase in the lab value.*

| <b>Lab Test</b>      | <b>Normoxic Odds Ratios (95% CI)</b> | <b>Hypoxic Odds Ratios (95% CI)</b> | <b>Unstratified Odds Ratios (95% CI)</b> | <b>Interaction P-value</b> |
|----------------------|--------------------------------------|-------------------------------------|------------------------------------------|----------------------------|
| <b>WBC</b>           | 1.392 (1.13-1.71)                    | 1.255 (0.911-1.73)                  | 1.33 (1.11-1.59)                         | 0.463                      |
| <b>ALBUMIN</b>       | 0.682 (0.555-0.837)                  | 0.927 (0.656-1.31)                  | 0.754 (0.634-0.896)                      | 0.095                      |
| <b>DDIMER</b>        | 1.106 (0.891-1.37)                   | 1.543 (1.12-2.12)                   | 1.214 (1.03-1.43)                        | 0.169                      |
| <b>FERRITIN</b>      | 1.458 (1.19-1.78)                    | 0.702 (0.48-1.03)                   | 1.1 (0.944-1.28)                         | 0.000256                   |
| <b>PROCALCITONIN</b> | 1.513 (1.09-2.1)                     | 1.165 (0.94-1.44)                   | 1.297 (1.06-1.59)                        | 0.145                      |
| <b>LDH</b>           | 2.094 (1.6-2.75)                     | 1.089 (0.896-1.32)                  | 1.534 (1.25-1.89)                        | 7.62E-05                   |
| <b>CRP</b>           | 1.709 (1.37-2.13)                    | 1.033 (0.768-1.39)                  | 1.451 (1.23-1.71)                        | 0.00481                    |
| <b>IL1B</b>          | 0.969 (0.759-1.24)                   | 1.052 (0.408-2.71)                  | 0.982 (0.776-1.24)                       | 0.979                      |
| <b>IL6</b>           | 2.024 (1.43-2.86)                    | 1.177 (0.866-1.6)                   | 1.496 (1.21-1.85)                        | 0.0134                     |
| <b>IL8</b>           | 3.706 (1.37-9.95)                    | 5.989 (1.45-24.6)                   | 3.857 (1.65-9.01)                        | 0.786                      |
| <b>TNFa</b>          | 0.942 (0.627-1.42)                   | 2.746 (0.648-11.7)                  | 1.073 (0.885-1.3)                        | 0.449                      |

Supplemental Figure 1: Flow diagram of included patients

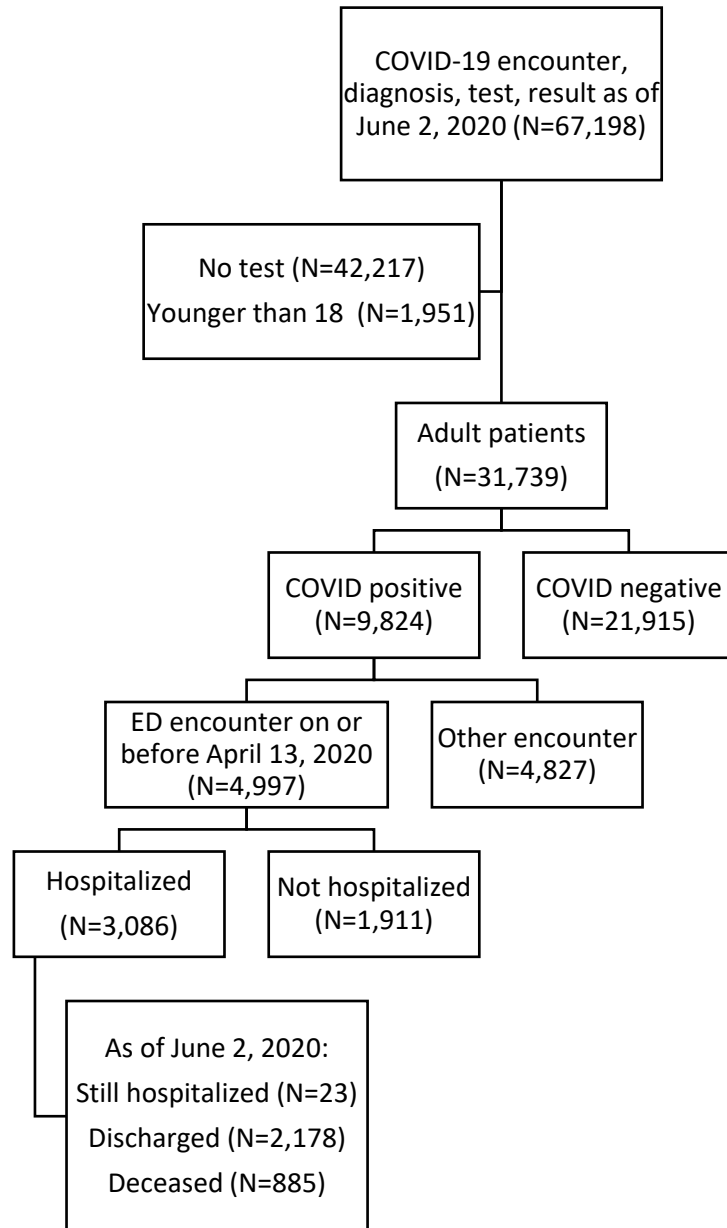

Supplemental Figure 2: Baseline lab values among patients admitted to The Mount Sinai Hospital, by sex. (A) White blood cells. (B) Procalcitonin. (C) lactate dehydrogenase. (D) C-reactive protein. (E) Ferritin, absolute values. (F) Ferritin, relative to upper limit of normal. (G) Interleukin-8. (H) Interleukin-6. (I) Tumor necrosis factor alpha. (J) Interleukin-1 beta. Dotted lines represent reference ranges. Female-specific reference ranges are in red while male-specific reference ranges are in blue. Significance levels are indicated by ns:  $p > 0.05$ , \*\*:  $p \leq 0.01$ , \*\*\*:  $p \leq 0.001$ ; \*\*\*\*:  $p \leq 0.0001$ .

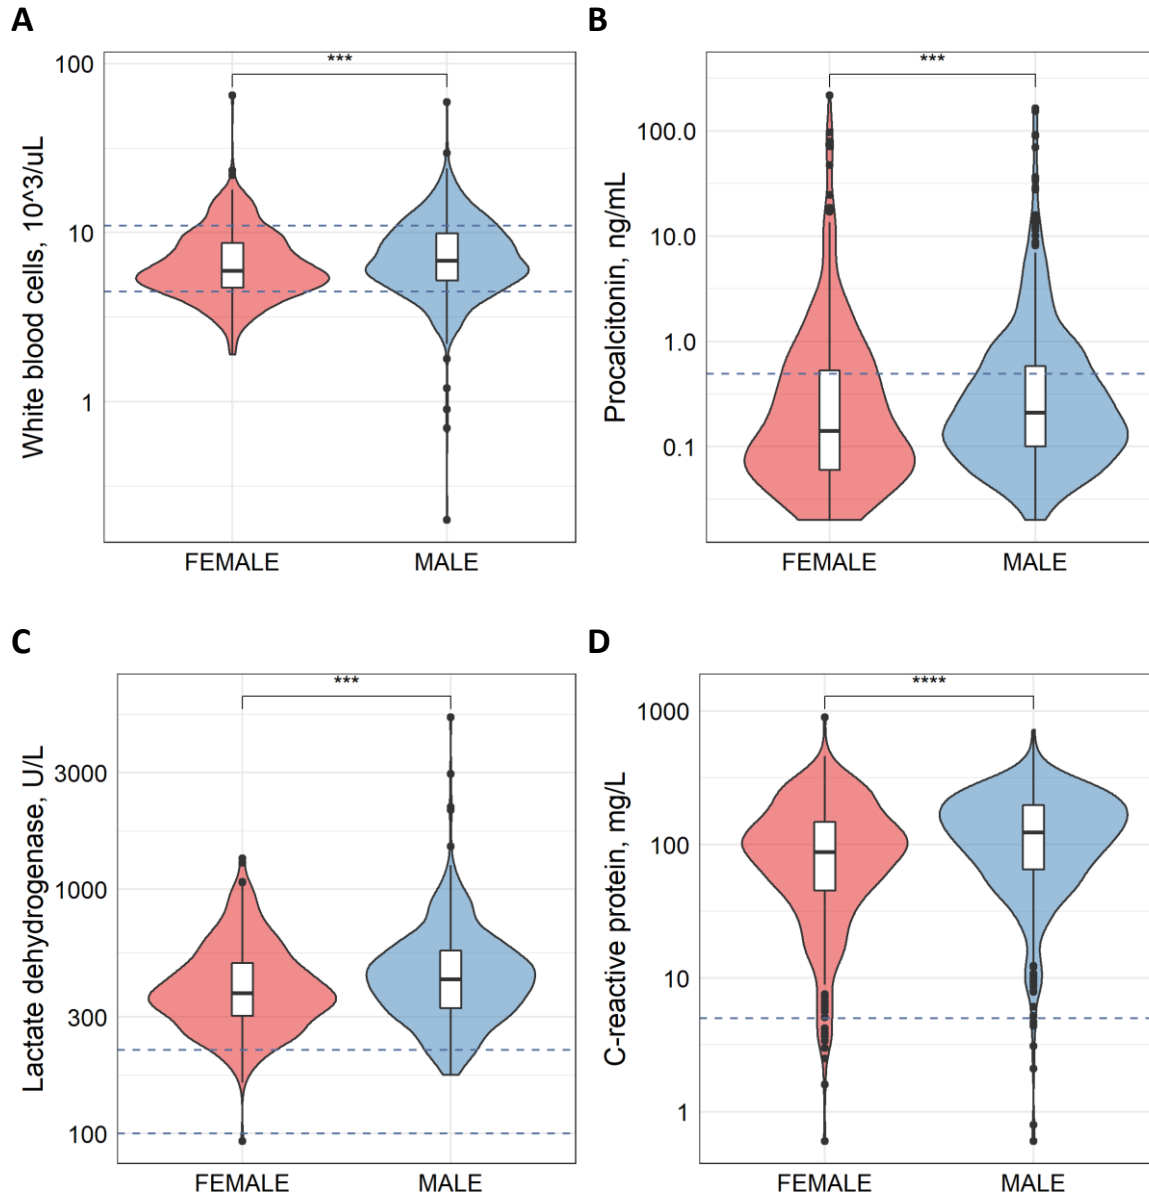

**E**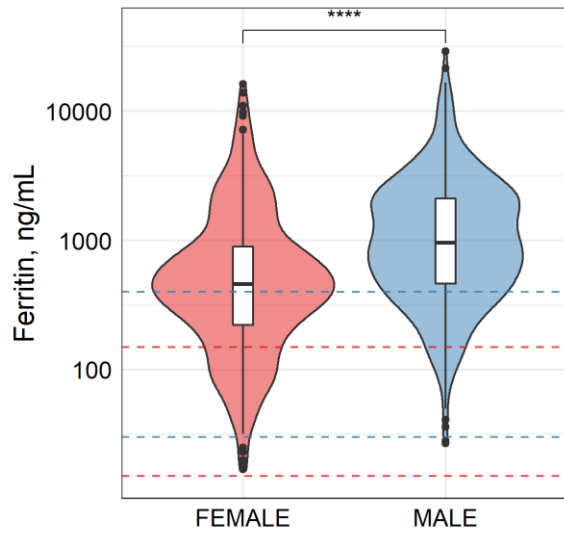**F**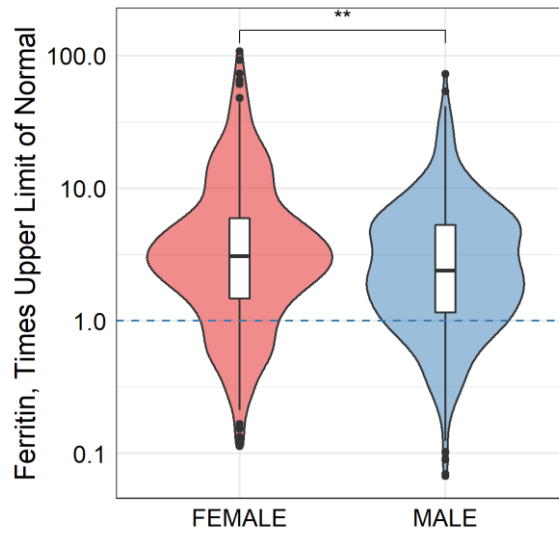**G**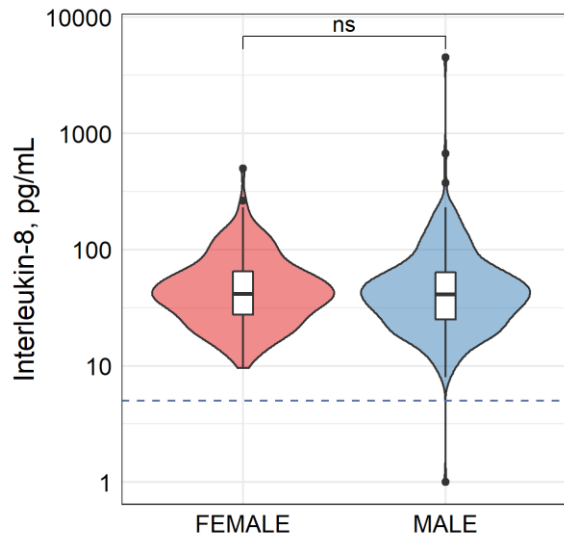**H**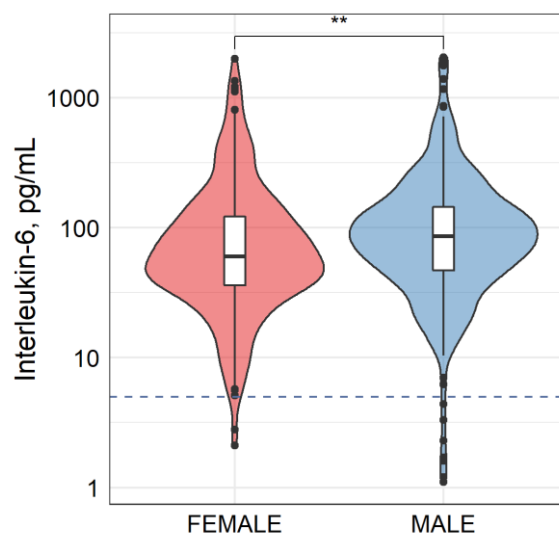

**I**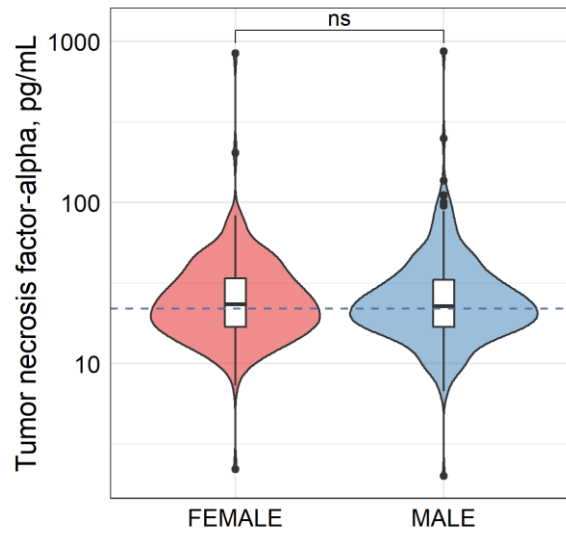**J**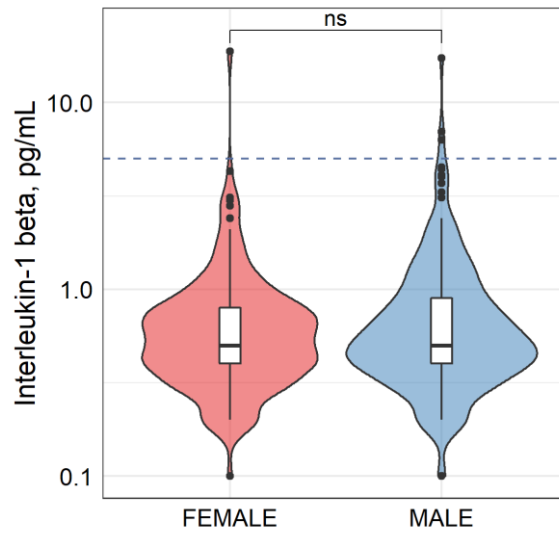

Supplement: Supplementary file [file 2020.07.29.20164640-1.pdf]
